# Supplementary material for: Identification and Expression Analysis of Stilbene Synthase Genes in Arachis hypogaea in Response to Methyl Jasmonate and Salicylic Acid Induction
Source: MDPI journal article supplement (doi:10.3390/plants11131776), 2022-07-05
Supplement: s1 [file s1]

## Supplementary Material

### Identification and expression analysis of *Stilbene synthase* genes in *Arachis hypogaea* in response to Methyl Jasmonate and Salicylic Acid induction

Zuhra Qayyum<sup>1,+</sup>, Fatima Noureen<sup>1,+</sup>, Maryam Khan<sup>1</sup>, Marrium Khan<sup>1</sup>, Ghulam Haider<sup>1</sup>, Faiza Munir<sup>1</sup>, Alvina Gul<sup>1</sup>, Rabia Amir<sup>1\*</sup>

<sup>1</sup>Department of Plant Biotechnology, Atta-ur-Rahman School of Applied Biosciences (ASAB), National University of Sciences and Technology (NUST), 44000, Islamabad, Pakistan

#### \* Correspondence:

Rabia Amir

rabi.amir@hotmail.com, rabia@asab.nust.edu.pk

## 1 Supplementary Figures and Tables

### 1.1 Supplementary Table

| <b>Table S1:</b> Nucleotide sequence of the nine contigs found in <i>Arachis hypogaea</i> |                                                                                        |                                                                                                                                                                                      |
|-------------------------------------------------------------------------------------------|----------------------------------------------------------------------------------------|--------------------------------------------------------------------------------------------------------------------------------------------------------------------------------------|
| <b>Sr. No.</b>                                                                            | <b>Nucleotide Sequences</b>                                                            | <b>Contig Results</b>                                                                                                                                                                |
| 1                                                                                         | <i>Arachis hypogaea</i> mRNA for stilbene synthase, complete CDS                       | <ul style="list-style-type: none"><li>• 20452 Conserved</li><li>• 31055 Not conserved</li><li>• 2394 Conserved</li><li>• 26372 Not conserved</li><li>• 19158 Not conserved</li></ul> |
| 2                                                                                         | <i>Arachis hypogaea</i> clone JC2 putative stilbene synthase gene, complete cds        | <ul style="list-style-type: none"><li>• 20452 Conserved</li><li>• 31055 Not conserved</li><li>• 2394 Conserved</li><li>• 19158 Not conserved</li></ul>                               |
| 3                                                                                         | <i>Arachis hypogaea</i> cultivar Champyeong stilbene synthase (STS) mRNA, complete cds | <ul style="list-style-type: none"><li>• 20452 Conserved</li><li>• 31055 Not conserved</li><li>• 2394 Conserved</li><li>• 26372 Not conserved</li></ul>                               |
| 4                                                                                         | <i>Arachis hypogaea</i> clone 05_08E putative stilbene synthase mRNA, partial cds      | <ul style="list-style-type: none"><li>• 20452 Conserved</li><li>• 31055 Not conserved</li><li>• 2394 Conserved</li><li>• 26372 Not conserved</li></ul>                               |
| 5                                                                                         | <i>Arachis hypogaea</i> clone 04_07D putative stilbene synthase mRNA, partial cds      | <ul style="list-style-type: none"><li>• 20452 Conserved</li><li>• 31055 Not conserved</li><li>• 2394 Conserved</li><li>• 26372 Not conserved</li></ul>                               |

|   |                                                                                                         |                                                                                                                                                             |
|---|---------------------------------------------------------------------------------------------------------|-------------------------------------------------------------------------------------------------------------------------------------------------------------|
| 6 | <i>Arachis hypogaea</i> clone 03_11D putative stilbene synthase mRNA, partial cds                       | <ul style="list-style-type: none"> <li>• 20452 Conserved</li> <li>• 31055 Not conserved</li> <li>• 2394 Conserved</li> <li>• 26372 Not conserved</li> </ul> |
| 7 | <i>Arachis hypogaea</i> stilbene synthase mRNA, complete cds                                            | <ul style="list-style-type: none"> <li>• 20452 Conserved</li> <li>• 31055 Not conserved</li> <li>• 2394 Conserved</li> <li>• 26372 Not conserved</li> </ul> |
| 8 | UNVERIFIED: <i>Arachis hypogaea</i> clone 04_06E putative stilbene synthase-like mRNA, partial sequence | <ul style="list-style-type: none"> <li>• 20452 Conserved</li> <li>• 31055 Not conserved</li> <li>• 2394 Conserved</li> <li>• 26372 Not conserved</li> </ul> |
| 9 | <i>A.hypogaea</i> gene for stilbene synthase                                                            | <ul style="list-style-type: none"> <li>• 20452 Conserved</li> <li>• 31055 Not conserved</li> <li>• 2394 Conserved</li> <li>• 26372 Not conserved</li> </ul> |

**Table S2.** Attributes of five *Stilbene synthase* (*AhSTSs*) genes identified in peanut.

| Genes         | NCBI<br>Accession<br>No. | Nucleotide<br>Sequence Length<br>Bp | Length of coding<br>sequence (position of<br>CDS)<br>Bp | Length of amino<br>acid sequence<br>Aa |
|---------------|--------------------------|-------------------------------------|---------------------------------------------------------|----------------------------------------|
| <i>AhSTS1</i> | MT663407                 | 1208 bp                             | 1169 (7-1176)                                           | 389                                    |
| <i>AhSTS2</i> | MT710308                 | 1454 bp                             | 1169 (82-1251)                                          | 389                                    |
| <i>AhSTS3</i> | MT710309                 | 1437 bp                             | 1169 (50-1219)                                          | 389                                    |
| <i>AhSTS4</i> | MT710310                 | 1548 bp                             | 869 (72-941)                                            | 289                                    |
| <i>AhSTS6</i> | MT710312                 | 1571 bp                             | 1169 (81-1250)                                          | 389                                    |

**Table S3.** Physiochemical properties of *Stilbene synthase* (*AhSTSs*) genes identified in peanut.

| Gene ID       | <sup>a</sup> aa | <sup>b</sup> pI | <sup>c</sup> Mw | <sup>d</sup> II | <sup>e</sup> AI | <sup>f</sup> EC | <sup>g</sup> GRAVY | Half<br>life | Sub-<br>cellular<br>localization |
|---------------|-----------------|-----------------|-----------------|-----------------|-----------------|-----------------|--------------------|--------------|----------------------------------|
| <i>AhSTS1</i> | 389             | 5.96            | 42952.7         | 35.03           | 91.23           | 33390           | -0.088             | >10<br>hours | cyto                             |
| <i>AhSTS2</i> | 389             | 6.84            | 59343.75        | 40.66           | 93.70           | 54360           | -0.070             | >10<br>hours | cyto                             |
| <i>AhSTS3</i> | 389             | 5.66            | 42840.39        | 35.17           | 91.98           | 33390           | -0.078             | >10<br>hours | cyto                             |
| <i>AhSTS4</i> | 289             | 6.71            | 32125.13        | 33.36           | 90.42           | 19285           | -0.107             | >10<br>hours | cyto                             |
| <i>AhSTS6</i> | 389             | 5.56            | 42817.30        | 32.02           | 92.01           | 34755           | -0.084             | >10<br>hours | cyto                             |

<sup>a</sup>Amino acid (protein length); <sup>b</sup>Isoelectric point; <sup>c</sup>Molecular weight (Da); <sup>d</sup>Instability index; <sup>e</sup>Aliphatic Index; <sup>f</sup>Extinction co-efficient; <sup>g</sup>Grand average of hydrophobicity.

**Table S4:** Cis-acting elements in the promoter region of stilbene synthase (*AhSTSs*) genes

| Gene ID       | Name         | Number | sequence         | Function                                                            |
|---------------|--------------|--------|------------------|---------------------------------------------------------------------|
| <i>AhSTS1</i> | Box 4        | 3      | ATTAAT           | part of a conserved DNA module involved in light responsiveness     |
|               | CAAT-Box     | 26     | CAAAT/CAAT       | common cis-acting element in promoter and enhancer regions          |
|               | GATA-motif   | 1      | AAGGATAAGG       | part of a light responsive element                                  |
|               | LAMP-element | 1      | CTTTATCA         | part of a light responsive element                                  |
|               | MRE          | 1      | AACCTAA          | MYB binding site involved in light responsiveness                   |
|               | TATC-box     | 1      | TATCCCA          | cis-acting element involved in gibberellin-responsiveness           |
|               | TCA-element  | 1      | CCATCTTTTT       | cis-acting element involved in salicylic acid responsiveness        |
|               | TGA-element  | 1      | AACGAC           | auxin-responsive element                                            |
|               | chs-         |        |                  |                                                                     |
|               | CMA1a        | 1      | TTACTTAA         | part of a light responsive element                                  |
| <i>AhSTS2</i> | ABRE         | 3      | ACGTG/CACGTG     | cis-acting element involved in the abscisic acid responsiveness     |
|               | ARE          | 1      | AAACCA           | cis-acting regulatory element essential for the anaerobic induction |
|               | Box 4        | 2      | ATTAAT           | part of a conserved DNA module involved in light responsiveness     |
|               | CAAT-box     | 30     | CAAAT/CAAT/CCAAT | common cis-acting element in promoter and enhancer regions          |
|               | CGTCA-motif  | 3      | CGTCA            | cis-acting regulatory element involved in the MeJA-responsiveness   |
|               | G-Box        | 2      | CACGTT/CACGTG    | cis-acting regulatory element involved in light responsiveness      |
|               | G-box        | 1      | CACGTG           | cis-acting regulatory element involved in light responsiveness      |
|               | TCT-motif    | 1      | TCTTAC           | part of a light responsive element                                  |
|               | TGA-element  | 1      | AACGAC           | auxin-responsive element                                            |

|               |               |    |              |                                                                    |
|---------------|---------------|----|--------------|--------------------------------------------------------------------|
|               | TGACG-motif   | 3  | TGACG        | cis-acting regulatory element involved in the MeJA-responsiveness  |
|               | chs-Unit 1 ml | 1  | ACCTAACCCGC  | part of a light responsive element                                 |
| <b>AhSTS3</b> | ABRE          | 2  | CACGTG/ACGTG | cis-acting element involved in the abscisic acid responsiveness    |
|               | Box 4         | 6  | ATTAAT       | part of a conserved DNA module involved in light responsiveness    |
|               | CAAT-box      | 25 | CAAAT/CAAT   | common cis-acting element in promoter and enhancer regions         |
|               | CGTCA-motif   | 1  | CGTCA        | cis-acting regulatory element involved in the MeJA-responsiveness  |
|               | G-Box         | 1  | CACGTG       | cis-acting regulatory element involved in light responsiveness     |
|               | G-box         | 1  | CACGTG       | cis-acting regulatory element involved in light responsiveness     |
|               | GATA-motif    | 1  | AAGATAAGATT  | part of a light responsive element                                 |
|               | I-box         | 1  | atGATAAGGTC  | part of a light responsive element                                 |
|               | RY-element    | 1  | CATGCATG     | cis-acting regulatory element involved in seed-specific regulation |
|               | TCA-element   | 1  | CCATCTTTTT   | cis-acting element involved in salicylic acid responsiveness       |
|               | TCT-motif     | 1  | TCTTAC       | part of a light responsive element                                 |
| <b>AhSTS4</b> | TGACG-motif   | 1  | TGACG        | cis-acting regulatory element involved in the MeJA-responsiveness  |
|               | ABRE          | 2  | CACGTG/ACGTG | is-acting element involved in the abscisic acid responsiveness     |
|               | Box 4         | 6  | ATTAAT       | part of a conserved DNA module involved in light responsiveness    |
|               | CAAT-box      | 26 | CAAAT/CAAT   | common cis-acting element in promoter and enhancer regions         |
|               | CGTCA-motif   | 1  | CGTCA        | cis-acting regulatory element involved in the MeJA-responsiveness  |
|               | G-Box         | 1  | CACGTG       | cis-acting regulatory element involved in light responsiveness     |
|               | G-box         | 1  | CACGTG       | cis-acting regulatory element involved in light responsiveness     |
|               | GATA-motif    | 1  | AAGATAAGATT  | part of a light responsive element                                 |

|               |                 |    |              |                                                                          |
|---------------|-----------------|----|--------------|--------------------------------------------------------------------------|
|               | I-box           | 1  | atGATAAGGTC  | part of a light responsive element<br>cis-acting regulatory element      |
|               | RY-<br>element  | 1  | CATGCATG     | involved in seed-specific<br>regulation                                  |
|               | TCA-<br>element | 1  | CCATCTTTTT   | cis-acting element involved in<br>salicylic acid responsiveness          |
|               | TCT-<br>motif   | 1  | TCTTAC       | part of a light responsive element<br>cis-acting regulatory element      |
|               | TGACG-<br>motif | 1  | TGACG        | involved in the MeJA-<br>responsiveness                                  |
| <b>AhSTS6</b> | ABRE            | 2  | CACGTG/ACGTG | cis-acting element involved in the<br>abscisic acid responsiveness       |
|               | Box 4           | 6  | ATTAAT       | part of a conserved DNA module<br>involved in light responsiveness       |
|               | CAAT-<br>box    | 27 | CAAAT/CAAT   | common cis-acting element in<br>promoter and enhancer regions            |
|               | CGTCA-<br>motif | 1  | CGTCA        | cis-acting regulatory element<br>involved in the MeJA-<br>responsiveness |
|               | G-Box           | 1  | CACGTG       | cis-acting regulatory element<br>involved in light responsiveness        |
|               | G-box           | 1  | CACGTG       | cis-acting regulatory element<br>involved in light responsiveness        |
|               | GATA-<br>motif  | 1  | AAGATAAGATT  | part of a light responsive element                                       |
|               | I-box           | 1  | atGATAAGGTC  | part of a light responsive element<br>cis-acting regulatory element      |
|               | RY-<br>element  | 1  | CATGCATG     | involved in seed-specific<br>regulation                                  |
|               | TCA-<br>element | 1  | CCATCTTTTT   | cis-acting element involved in<br>salicylic acid responsiveness          |
|               | TCT-<br>motif   | 1  | TCTTAC       | part of a light responsive element<br>cis-acting regulatory element      |
|               | TGACG-<br>motif | 1  | TGACG        | involved in the MeJA-<br>responsiveness                                  |

| <b>Table S5.</b> Primers identity and sequences used for Stilbene synthase ( <i>AhSTSs</i> ) gene amplification and RT-PCR analysis |                                |                        |                       |
|-------------------------------------------------------------------------------------------------------------------------------------|--------------------------------|------------------------|-----------------------|
| <b>Primer Name</b>                                                                                                                  | <b>Purpose of primer</b>       | <b>5'-Forward</b>      | <b>3'-Reverse</b>     |
| <i>AhSTS</i> 1                                                                                                                      | Full length gene amplification | AGCGAAGCTTTACTCTCA     | ATGGGCCAATCTAGACCT    |
|                                                                                                                                     | RT-PCR                         | ACCAGGTTGAACAGAAGGTG   | ACCCCAATCAAATCCTTCTC  |
| <i>AhSTS</i> 2                                                                                                                      | Full length gene amplification | TGATCTTCTGCACCACAA GC  | CTCAGAACAAACCACCAGC A |
|                                                                                                                                     | RT-PCR                         | CACGTGATGTTCTTAGCG AT  | TTCAATAGTGAGGCCAGGTC  |
| <i>AhSTS</i> 3                                                                                                                      | Full length gene amplification | TTTCAGCGCATTTGTGAA AG  | CTTGGTTGCTGCCTCTTTTC  |
|                                                                                                                                     | RT-PCR                         | TCACACATTTGATCTTCT GC  | TGTTATTTTCAGCCAAGTCC  |
| <i>AhSTS</i> 4                                                                                                                      | Full length gene amplification | TTTCAGCGCATTTGTGAG AG  | AGTTGCAGCCTCTTTTCCAA  |
|                                                                                                                                     | RT-PCR                         | AGCACATACGCAGATTAC TA  | CAAGGACGGTGCTTTATATG  |
| <i>AhSTS</i> 6                                                                                                                      | Full length gene amplification | TTTCAGCGCATTTGTGAG AG  | AGTTGCAGCCTCTTTTCCAA  |
|                                                                                                                                     | RT-PCR                         | TGGTTCTGATCCTATTCC AG  | AAAGCTTTAGTGAGTGCATC  |
| Actin                                                                                                                               | Reference gene                 | CAGGCCGTTCTCTCCCTTT AT | CATCAAGGCATCGGTGAGAT  |

**Table S6.** Correlation between time and the expression of *Stilbene synthase* (*AhSTSs*) genes under the treatment of methyl jasmonate and salicylic acid in peanut.

| Genes          |                 | Methyl Jasmonate | Salicylic Acid |
|----------------|-----------------|------------------|----------------|
|                |                 | Bard-479         | Bard-479       |
| <i>AhSTS1</i>  | <i>R</i>        | 0.8905           | -0.4962        |
|                | <i>p</i> -value | 0.0428           | 0.3952         |
| <i>AhSTS 2</i> | <i>R</i>        | 0.7479           | -0.5012        |
|                | <i>p</i> -value | 0.1461           | 0.3897         |
| <i>AhSTS 3</i> | <i>R</i>        | 0.2974           | -0.4976        |
|                | <i>p</i> -value | 0.6269           | 0.3936         |
| <i>AhSTS 4</i> | <i>R</i>        | 0.9622           | 0.06101        |
|                | <i>p</i> -value | 0.0088           | 0.9224         |
| <i>AhSTS 6</i> | <i>R</i>        | -0.3062          | 0.05057        |
|                | <i>p</i> -value | 0.6163           | 0.9356         |

*p*-value (0.05) is considered to be significant; *r* is representing Pearson's correlation coefficient.

**Table S7.** Correlation among the expression of *Stilbene synthase* (*AhSTSs*) genes in peanut.

| BARD-479      |                 | Methyl Jasmonate |               |               |               | Salicylic Acid |               |               |               |
|---------------|-----------------|------------------|---------------|---------------|---------------|----------------|---------------|---------------|---------------|
|               |                 | <i>AhSTS2</i>    | <i>AhSTS3</i> | <i>AhSTS4</i> | <i>AhSTS6</i> | <i>AhSTS2</i>  | <i>AhSTS3</i> | <i>AhSTS4</i> | <i>AhSTS6</i> |
| <i>AhSTS1</i> | <i>R</i>        | 0.6679           | 0.5668        | 0.7984        | -0.2193       | 0.07160        | 0.2334        | -0.5149       | -0.5254       |
|               | <i>p</i> -value | 0.2180           | 0.3191        | 0.1053        | 0.7231        | 0.9089         | 0.7056        | 0.3747        | 0.3632        |
| <i>AhSTS2</i> | <i>R</i>        | ----             | 0.6804        | 0.7972        | 0.3949        | ----           | 0.9795        | -0.3195       | -0.3079       |
|               | <i>p</i> -value | ---              | 0.2062        | 0.1062        | 0.5105        | ---            | 0.0035        | 0.6002        | 0.6142        |
| <i>AhSTS3</i> | <i>R</i>        | ---              | ---           | 0.2755        | 0.6279        | ---            | ---           | -0.3881       | -0.3808       |
|               | <i>p</i> -value | ----             | ----          | 0.6537        | 0.2567        | ----           | ---           | 0.5185        | 0.5271        |
| <i>AhSTS4</i> | <i>R</i>        | ---              | ---           | ---           | -0.1779       | ---            | ---           | ---           | 0.9997        |
|               | <i>p</i> -value | ---              | ---           | ---           | 0.7747        | ---            | ---           | ---           | < 0.0001      |

*p*-value (0.05) is considered to be significant; *r* is representing Pearson's correlation coefficient.

## 1.2 Supplementary Figures

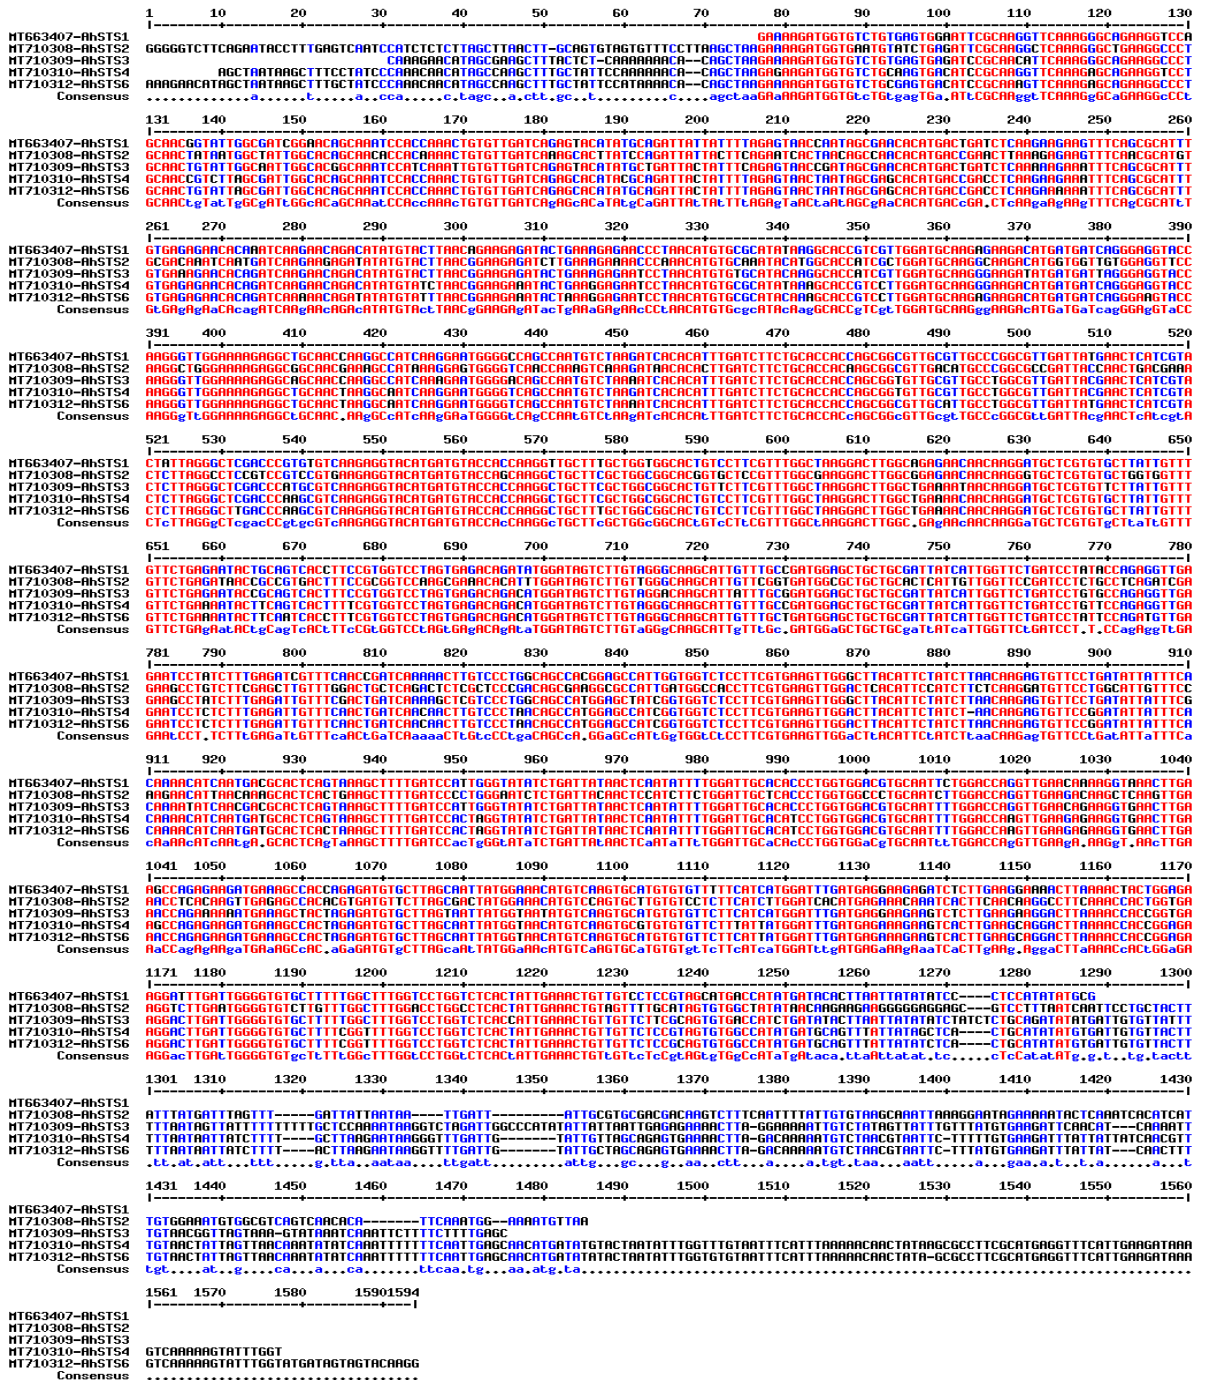

**Figure S1.** Multiple sequence alignment of nucleotide sequence of the *AhSTS1*, *AhSTS2*, *AhSTS3*, *AhSTS4*, *AhSTS6*. The sequences conserved across all genes are highlighted in red while non-conserved sequences are shown in black. The sequences highlighted in blue shows sequences conserved in some genes.



Multiple sequence alignment of amino acid sequences of *AhSTS1*, *AhSTS2*, *AhSTS3*, *AhSTS4*, and *AhSTS6*. The sequences conserved across all genes are highlighted in red while non-conserved sequences are shown in black. The sequences highlighted in blue shows sequences conserved in some genes.

```

1      10      20      30      40      50      60      70      80      90      100     110     120     130
MT663407-AhSTS1  HVSVSGIIRKVQREGPATVLAIGTANPNCVDQSTYADYFRVTNSEHTDLKKFQRICERTQIKNRHMYLTEELKENPNHCAYKAPSLDAREDMHIREVPRVGKEARTKAKEWGQPSKITHLIFC
MT710309-AhSTS3  HVSVSSEIRNIQREGPATVLAIGTANPNCVDQSTYADYFRVTNSEHTDLKKFQRICERTQIKNRHMYLTEELKENPNHCAYKAPSLDAREDMHIREVPRVGKEARTKAKEWGQPSKITHLIFC
MT710312-AhSTS6  HVSSDIRKVQREGPATVLAIGTANPNCVDQSTYADYFRVTNSEHTDLKKFQRICERTQIKNRHMYLTEELKENPNHCAYKAPSLDAREDMHIREVPRVGKEARTKAKEWGQPSKITHLIFC
MT710308-AhSTS2  HVSSEIRKVQREGPATVLAIGTANPNCVDQSTYADYFRVTNSEHTDLKKFQRICERTQIKNRHMYLTEELKENPNHCAYKAPSLDAREDMHIREVPRVGKEARTKAKEWGQPSKITHLIFC
MT710310-AhSTS4  HVSSDIRKVQREGPATVLAIGTANPNCVDQSTYADYFRVTNSEHTDLKKFQRICERTQIKNRHMYLTEELKENPNHCAYKAPSLDAREDMHIREVPRVGKEARTKAKEWGQPSKITHLIFC
Consensus        HVSaSDIRkVQREGPATVLAIGTANPNCVDQSTYADYFRITTS#HT#LKKFQRIC#rtqIKnRhmYLTEELKENPNHCAYKAPSLDAR#DMH!rEVPRVGKEARTKAKEWGQPSKITHLIFC

131     140     150     160     170     180     190     200     210     220     230     240     250     260
MT663407-AhSTS1  TTSGVALPGVDYELIVLLGLDPCVKRYMYHQGCFAGGTVLRLAKDLAENNKDARVLYVCSENTAVTFRGPSETDMSLVGQALFAGGAARIIGSDPIPEVENPIFEIVSTDOQLVPGSHGAIGGLRE
MT710309-AhSTS3  TTSGVALPGVDYELIVLLGLDPCVKRYMYHQGCFAGGTVLRLAKDLAENNKDARVLYVCSENTAVTFRGPSETDMSLVGQALFAGGAARIIGSDPIPEVEKPIFEIVSTDOQLVPGSHGAIGGLRE
MT710312-AhSTS6  TTSGVALPGVDYELIVLLGLDPCVKRYMYHQGCFAGGTVLRLAKDLAENNKDARVLYVCSENTAVTFRGPSETDMSLVGQALFAGGAARIIGSDPIPEVENPIFEIVSTDOQLVPGSHGAIGGLRE
MT710308-AhSTS2  TTSGVDHPGADYQLTKLLGLRPSVKRYMYHQGCFAGGTVLRLAKDLAENNKDARVLYVCSENTAVTFRGPSETHLDSLVGQALFAGGAARIIGSDPLPIQIEKPVFELVMTAQTLPDSEGAIDGHLRE
MT710310-AhSTS4  TTSGVDHPGADYQLTKLLGLRPSVKRYMYHQGCFAGGTVLRLAKDLAENNKDARVLYVCSENTAVTFRGPSETHLDSLVGQALFAGGAARIIGSDPLPIQIEKPVFELVMTAQTLPDSEGAIDGHLRE
Consensus        TTSGVaPGVDY#LiVLLGLDPSVKRYMYHQGCFAGGTVLRLAKDLAENNKDARVLYVCSENTAVTFRGPSETDMSLVGQALFAGGAARIIGSDPV#EnPIFEIVSTDOQLVPGSHGAIGGLRE

261     270     280     290     300     310     320     330     340     350     360     370     380     389
MT663407-AhSTS1  VGLTFYLNKSVPDLIISQNINDALSKAFDPLGISDYNSIFAIHAPGGRAILDQVEKVNLKPEKHKATRDVLSNYGNHSSACVFFIMDLARKSLEGKLKTIGEGFDHGVLFFGPGPLTIETVVLRSMTI
MT710309-AhSTS3  VGLTFYLNKSVPDLIISQNINDALSKAFDPLGISDYNSIFAIHAPGGRAILDQVEKVNLKPEKHKATRDVLSNYGNHSSACVFFIMDLARKSLEGKLKTIGEGFDHGVLFFGPGPLTIETVVLRSVTI
MT710312-AhSTS6  VGLTFYLNKSVPDLIISQNINDALSKAFDPLGISDYNSIFAIHAPGGRAILDQVEKVNLKPEKHKATRDVLSNYGNHSSACVFFIMDLARKSLEGKLKTIGEGFDHGVLFFGPGPLTIETVVLRSVAI
MT710308-AhSTS2  VGLTFHLLKDVPGLIYSKNINKLTAFDPLGISDYNSIFAIHAPGGRAILDQVEKLKLKPKHLKATRDVLSNYGNHSSACVFFIMDLARKSLQGLQLTIGEGLEHGVLFFGPGPLTIETVVLRSVAI
MT710310-AhSTS4  VGLTFYLTWFRILFAHTSNHMSKLLTH
Consensus        VGLTFYL.k.vp.i.sknin.al.kafdplgisdynsifaihappg.aildqve.k..lkp.k..atrdvls.ygnhssacv.fid.mr..sl...l.ttgeg...ugvlfgpggllietvvl.s...i

```

**Figure S2.** Multiple sequence alignment of amino acid sequences of *AhSTS1*, *AhSTS2*, *AhSTS3*, *AhSTS4*, and *AhSTS6*. The sequences conserved across all genes are highlighted in red while non-conserved sequences are shown in black. The sequences highlighted in blue shows sequences conserved in some genes.

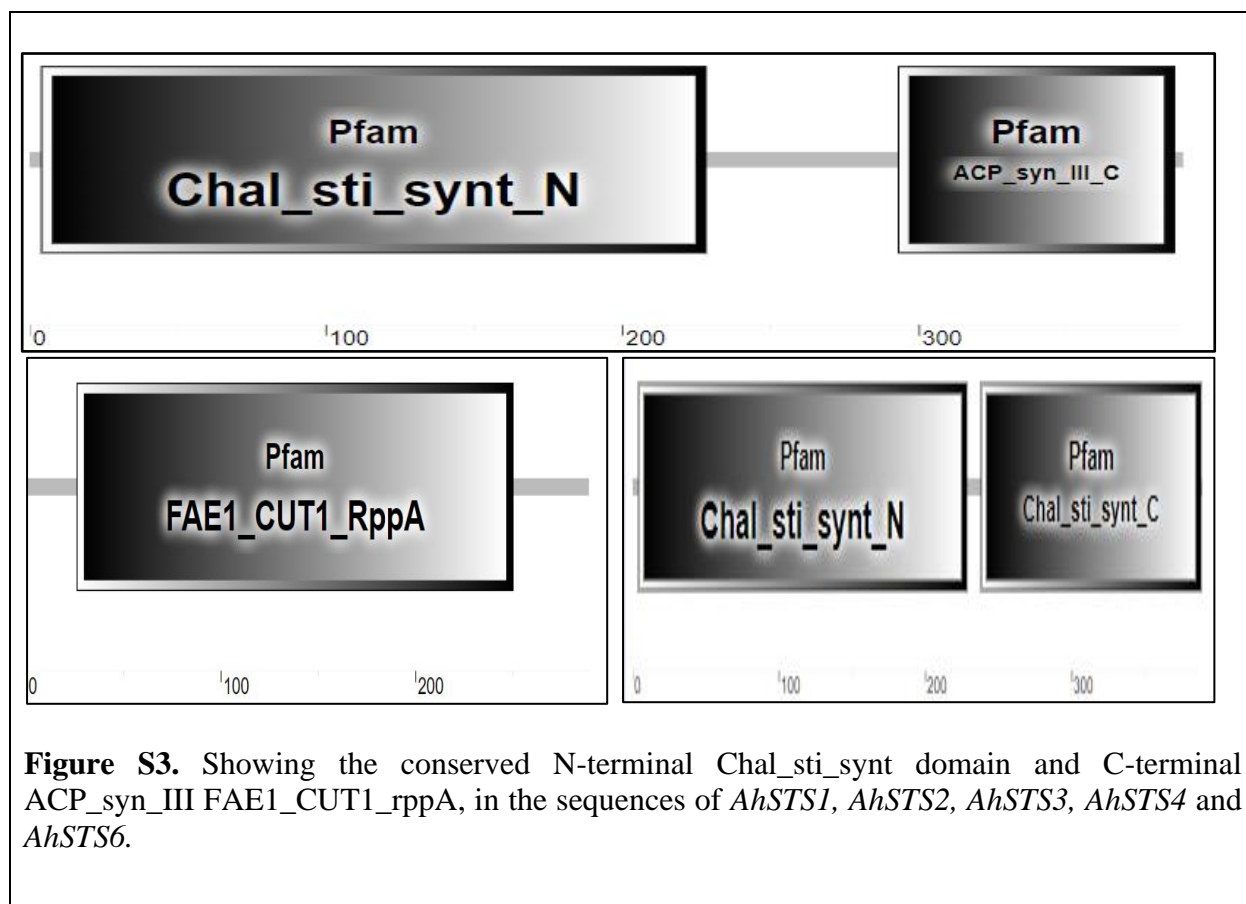

**Figure S3.** Showing the conserved N-terminal Chal\_sti\_synt domain and C-terminal ACP\_syn\_III FAE1\_CUT1\_rppA, in the sequences of *AhSTS1*, *AhSTS2*, *AhSTS3*, *AhSTS4* and *AhSTS6*.

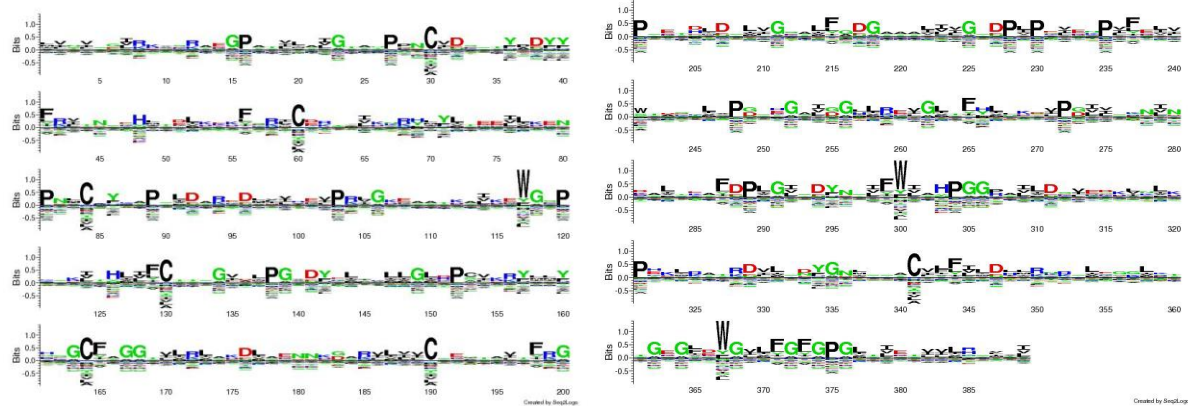

**Figure S4.** Sequence logo of *AhSTSs*. X-axis showing the position of position of amino acid whereas stack of symbols representing the amino acids (big stacks represent conserved positions and small stacks represents variable position).

### Predicted Secondary Structure of *Arachis hypogaea*

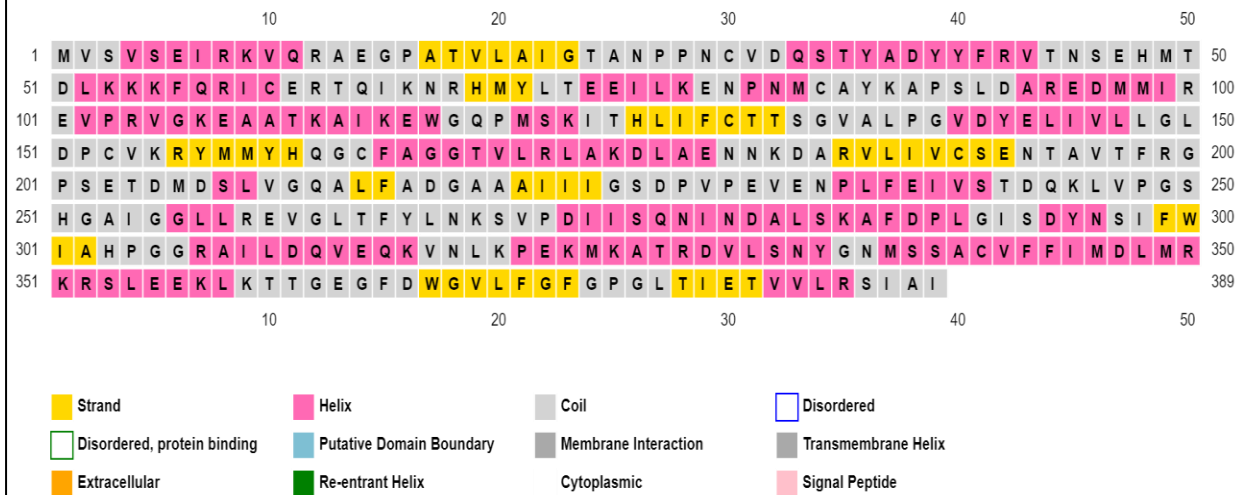

**Figure S5:** secondary structure of *Arachis hypogaea STS1* showing alpha helices and beta sheets. Loops are also observed in the structure.

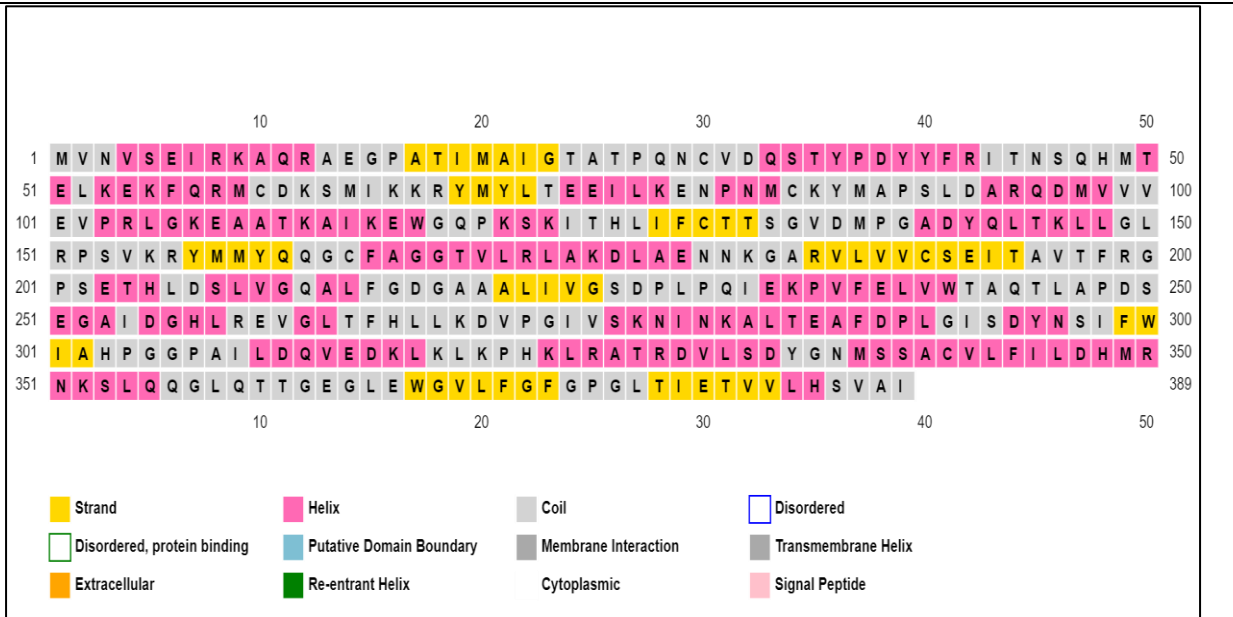

**Figure S6:** Predicted secondary structure of *Arachis hypogaea* STS2 showing alpha helices and beta sheets. Loops are also observed in the structure.

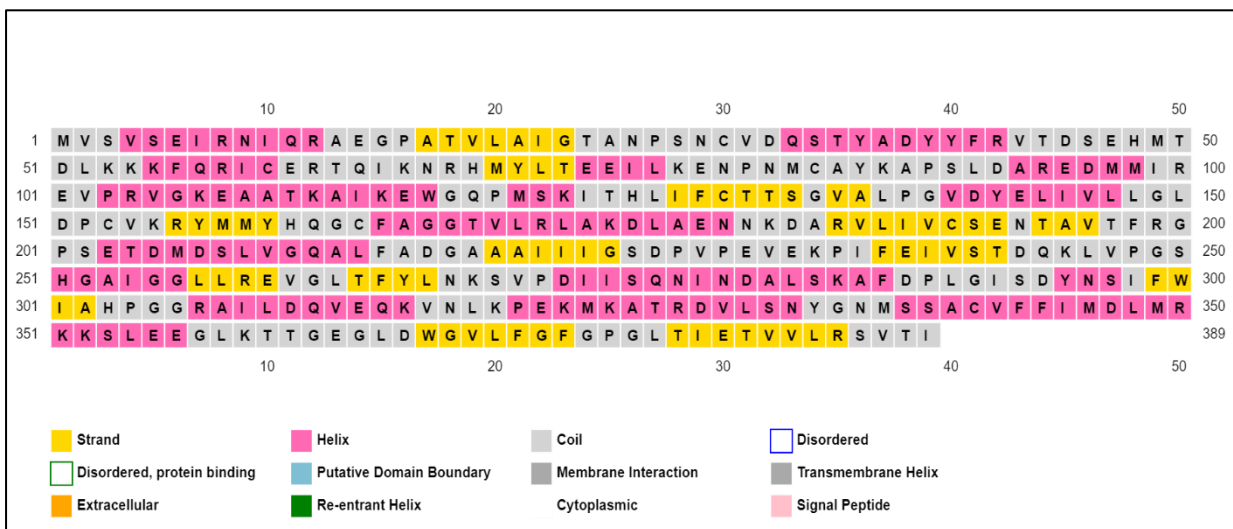

**Figure S7:** Predicted secondary structure of *Arachis hypogaea* STS3 showing alpha helices and beta sheets. Loops are also observed in the structure.

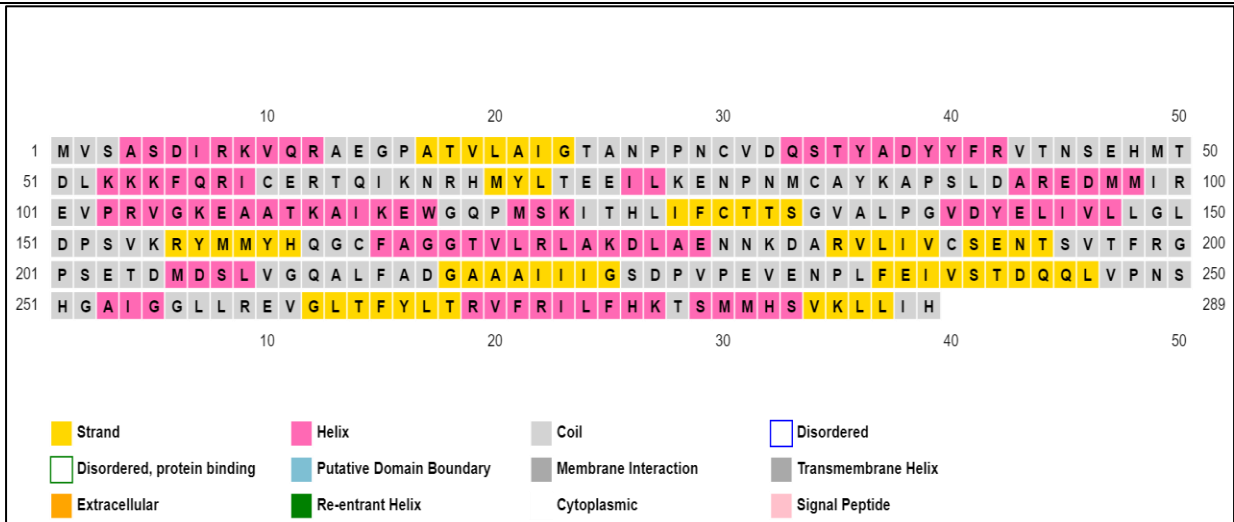

**Figure S8:** Predicted secondary structure of *Arachis hypogaea* STS4 showing alpha helices and beta sheets. Loops are also observed in the structure.

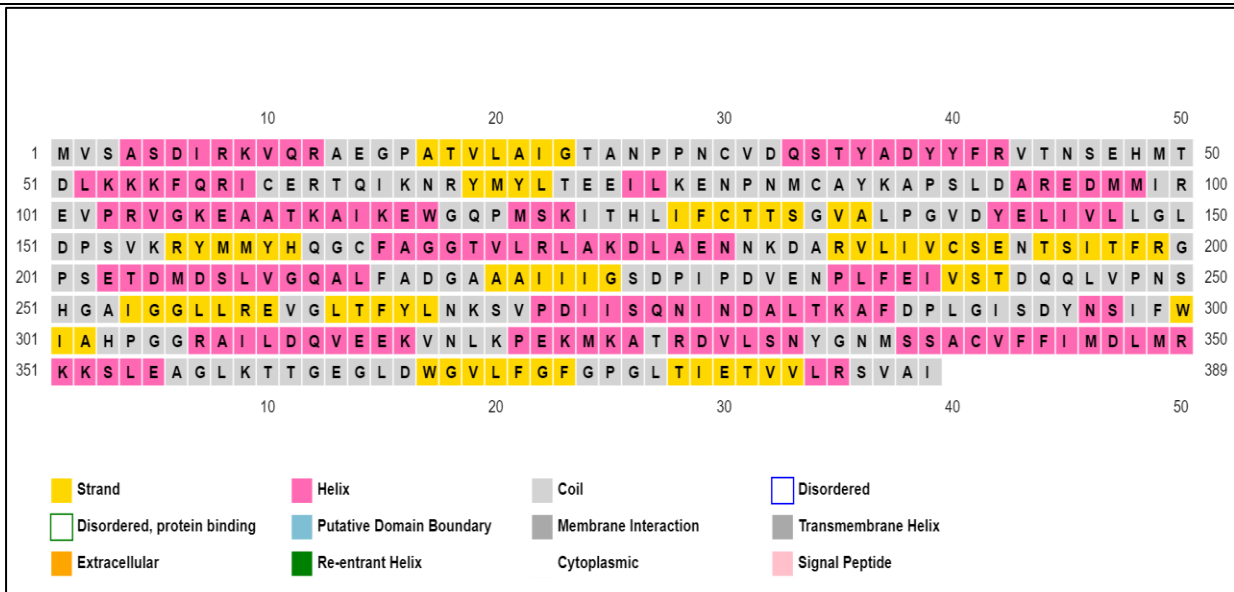

**Figure S9:** Predicted secondary structure of *Arachis hypogaea* STS6 showing alpha helices and beta sheets. Loops are also observed in the structure.

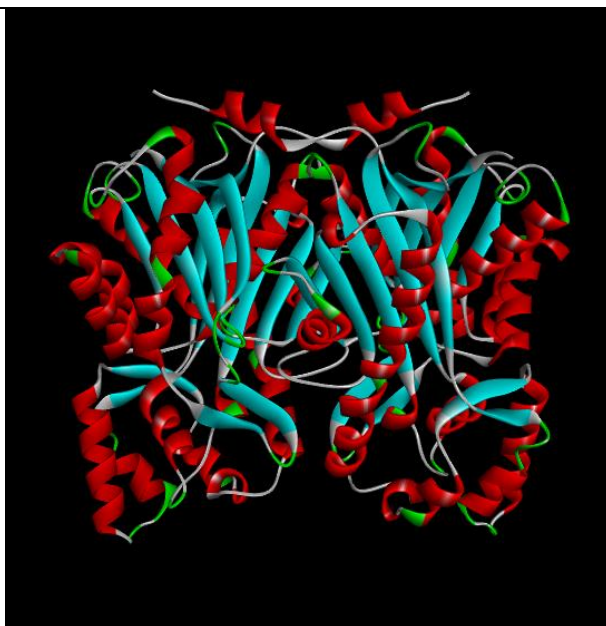

**Figure S10.** 3D structure of *AhSTS1* predicted from the SWISS-MODEL. The red colour indicates helices, green colour represents loops and cyan colour represent  $\beta$ -sheets.

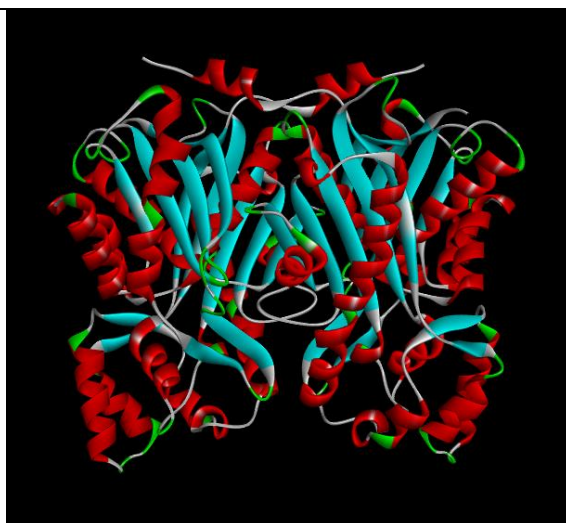

**Figure S11.** 3D structure of *AhSTS2* predicted from the SWISS-MODEL. The red colour indicates helices, green colour represents loops and cyan colour represent  $\beta$ -sheets.

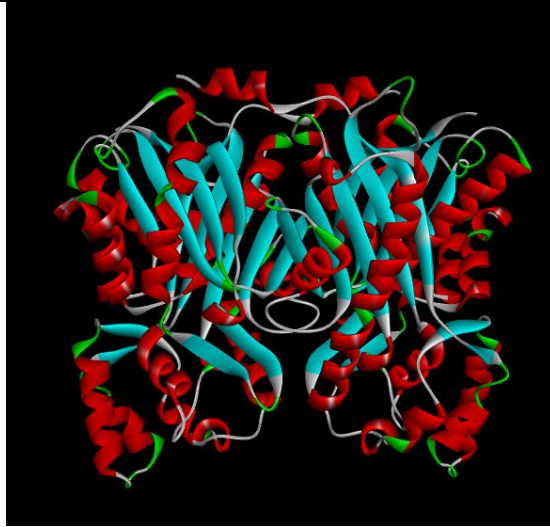

**Figure S12.** 3D structure of *AhSTS3* predicted from the SWISS-MODEL. The red colour indicates helices, green colour represents loops and cyan colour represent  $\beta$ -sheets.

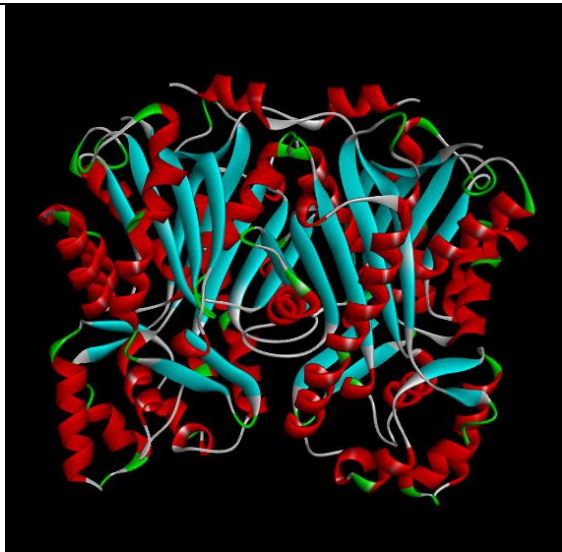

**Figure S13.** 3D structure of *AhSTS4* predicted from the SWISS-MODEL. The red colour indicates helices, green colour represents loops and cyan colour represent  $\beta$ -sheets.

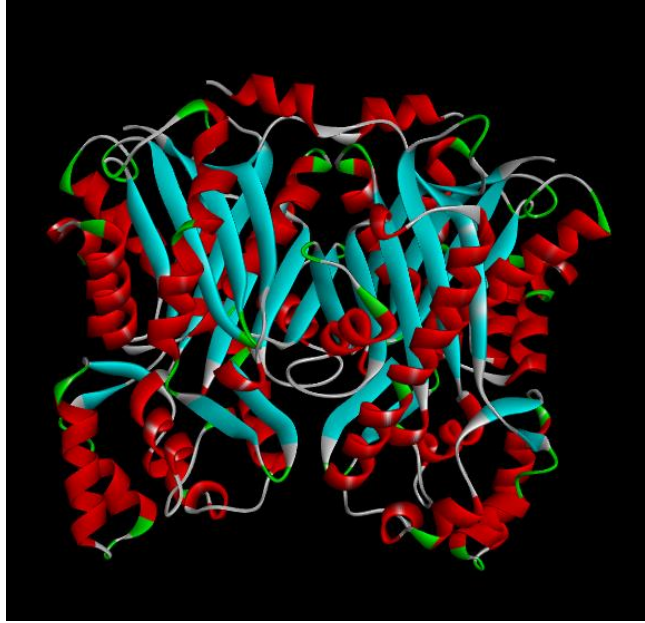

**Figure S14.** 3D structure of *AhSTS6* predicted from the SWISS-MODEL. The red colour indicates helices, green colour represents loops and cyan colour represent  $\beta$ -sheets.

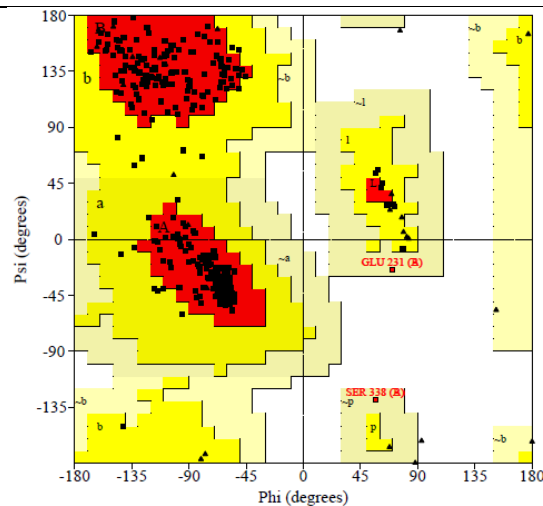

**Figure S15.** Ramachandran Plot of *stilbene synthase* protein in *Arachis hypogaea*. The graph shows the location of amino acid residues in the favored region of protein. For *AhSTS1*, the location of amino acids in the favored region 92.9% forming a stable protein.



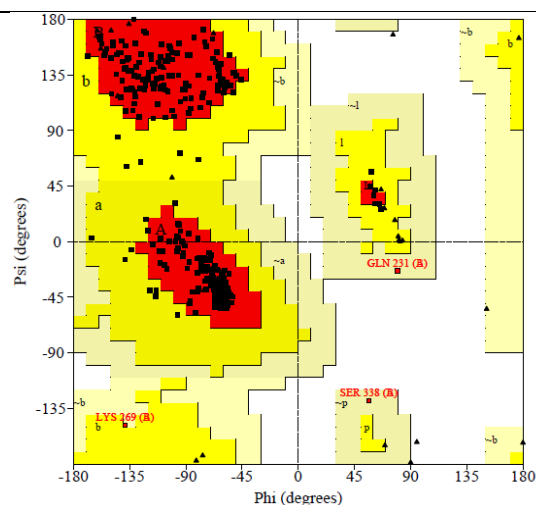

**Figure S16.** Ramachandran Plot of *stilbene synthase* protein in *Arachis hypogaea*. The graph shows the location of amino acid residues in the favored region of protein. For *AhSTS2*, the location of amino acids in the favored region 93.8% forming a stable protein.

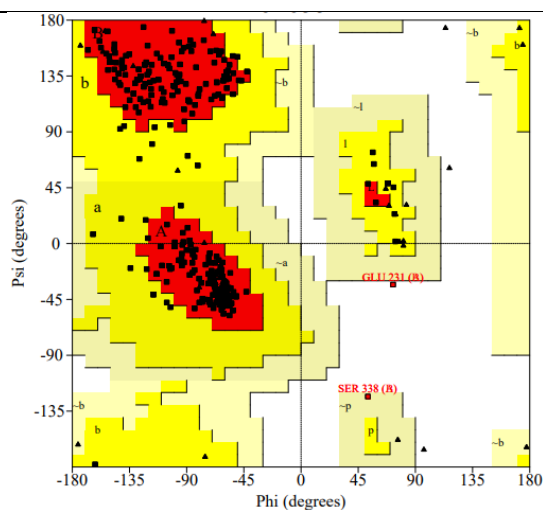

**Figure S17.** Ramachandran Plot of *stilbene synthase* protein in *Arachis hypogaea*. The graph shows the location of amino acid residues in the favored region of protein. For *AhSTS3*, the location of amino acids in the favored region 92 % forming a stable protein.



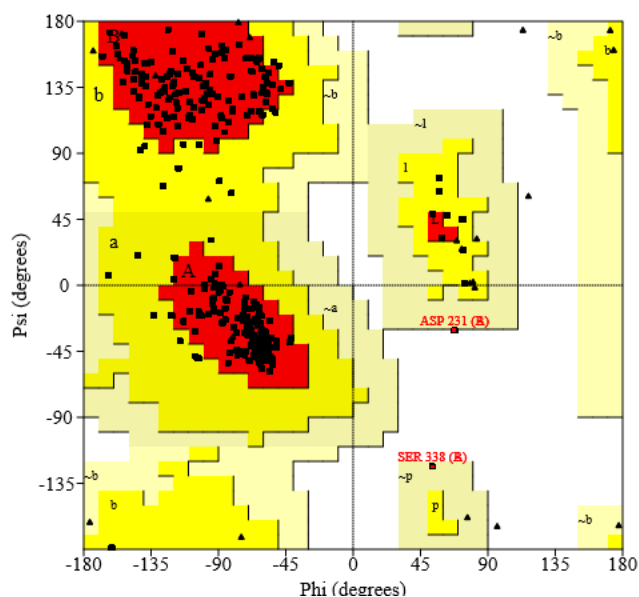

**Figure S18.** Ramachandran Plot of *stilbene synthase* protein in *Arachis hypogaea*. The graph shows the location of amino acid residues in the favored region of protein. For *AhSTS4*, the location of amino acids in the favored region 92.3 % forming a stable protein.

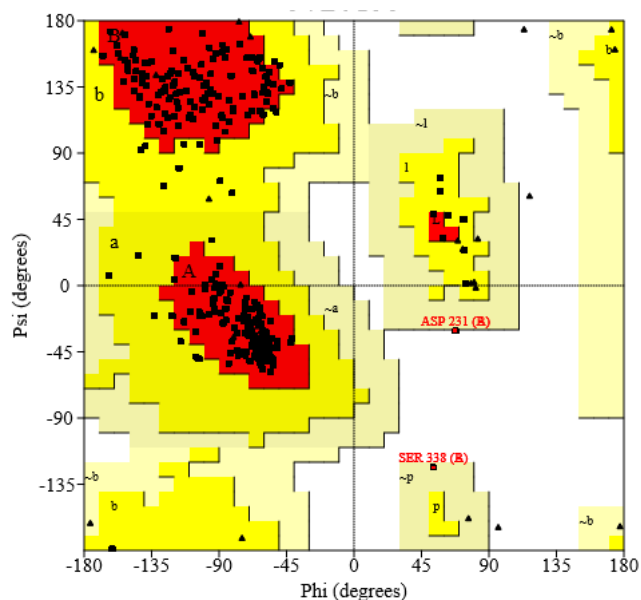

**Figure S19.** Ramachandran Plot of *stilbene synthase* protein in *Arachis hypogaea*. The graph shows the location of amino acid residues in the favored region of protein. For *AhSTS6*, the location of amino acids in the favored region 92.3 % forming a stable protein.

## 2. Hormonal Stock Solution 100 $\mu$ M MeJA

Density of MeJA = 1.03g/cm<sup>3</sup>

To find molarity of solution

MeJA in solution = 1.03 x 1000

$$= 1030\text{g/l}$$

Molarity = given mass / Molar mass

$$= 1030/244.3$$

$$= 4.5\text{M}$$

To prepare 150ml stock solution of 100 $\mu$ M MeJA

$$M_1V_1 = M_2V_2$$

$$4.5 \times 10^6 \times V_1 = 100 \times 150$$

$$V_1 = 15000/4500000$$

$$V_1 = 0.0033 \text{ ml} \times 1000$$

$$V_1 = 3.3 \mu\text{l MeJA}$$

### Procedure:

1. Take 100 ml of distilled water in a sterilized beaker.
2. Place the beaker on hot plate. Pre-warm the distilled water. Add 3.3 $\mu$ l of MeJA to the water and stir the solution. Add absolute ethanol dropwise to dissolve MeJA. Keep on stirring the solution.
3. As soon as MeJA dissolves in dH<sub>2</sub>O an insoluble transparent layer disappears. Make the volume up to 150 ml by adding warm distilled water. Place the stock solution in transparent bottle wrapped in aluminum foil in refrigerator.
4. Do not add too much alcohol as it will disturb the volume concentration.

## Hormonal Stock Solution 1mM SA

1M SA is prepared by adding 138.121 g powdered SA in 1 litre water.

1mM SA is prepared by adding 138.1 mg powdered SA in 1 litre water.

To prepare 200 ml 1mM SA, 27.62mg of SA is dissolved in 200ml dH<sub>2</sub>O.

### Procedure:

- Take a clean beaker and fill it with 150 ml distilled water.
- Place the beaker on hot plate and put magnetic stirrer in the beaker.
- Pre-warm dH<sub>2</sub>O and add SA pinch by pinch.

- Keep the magnetic stirrer on.
- A white foam is formed.
- Start adding absolute ethanol drop wise in the solution.
- SA starts dissolving. Keep the solution stirred to get smooth consistency.
- When a clear SA solution is formed add dH<sub>2</sub>O to make up the volume to 200.

***Arachis hypogaea Stilbene synthase (AhSTS1) complete CDS***

ATGGTGTCTGTGAGTGAGATTCGCAAGGTTCAAAGGGCAGAAGGTCCAGCAACTGTATTGGCGATTGG  
AACAGCAAATCCACCAAAGTGTGTTGATCAGAGTACATATGCAGATTATTATTTTAGAGTAACTAACAGC  
GAACACATGACTGATCTCAAGAAGAAGTTTCAGCGCATTTGTGAGAGAACACAAATCAAGAACAGACAT  
ATGTACTTAACAGAAGAGATACTGAAAGAGAACCCTAACATGTGCGCATACAAGGCACCGTCGTTGGAT  
GCAAGAGAAGACATGATGATCAGGGAGGTACCAAGGGTTGGAAAAGAGGCTGCAACCAAGGCCATCA  
AAGAATGGGGCCAGCCAATGTCTAAGATCACGCATTTGATCTTCTGTACCACCAGCGGCGTTGCGTTGC  
CTGGCGTTGATTATGAACTCATCGTACTCTTAGGGCTCGACCCATGCGTCAAGAGGTACATGATGTACCA  
CCAAGGCTGCTTCGCTGGTGGCACTGTCTTCGTTTGGCTAAGGACTTGGCTGAAAACAACAAGGATGC  
TCGTGTGCTTATCGTTTGTCTGAGAATACCGCAGTCACTTTCCGTGGTCCTAGTGAGACAGACATGGAT  
AGTCTGTAGGGCAAGCATTGTTTGGCGATGGAGCTGCTGCGATTATCATTGGTTCTGATCCTGTTCCAG  
AGGTTGAGAATCCTCTCTTTGAGATTGTTTCACTGATCAAAAAGTGTCCCTGGCAGCCATGGAGCCAT  
CGGTGGTCTCCTTCGTGAAGTTGGGCTTACATTCTATCTTAACAAGAGTGTTTCTGATATTATTTACAAA  
ACATCAATGATGCACTCAGTAAAGCTTTTGATCCATTGGGTATATCTGATTATACTCAATATTTTGGATT  
GCACACCCTGGTGGACGTGCAATTTTGGACCAGGTTGAACAGAAGGTGAACTTGAAACCAGAGAAGAT  
GAAAGCCACCAGAGATGTGCTTAGCAATTATGGTAACATGTCAAGTGCATGTGTGTTTTTCATCATGGAT  
TTGATGAGGAAGAGATCTCTGAAGAAAACTTAAACTACTGGAGAAGGATTTGATTGGGGTGTGCTT  
TTTGGCTTTGGTCTGCTCACTATTGAACTGTTGTGCTCCGCAGCATAGCCATATGA

**Putative promoter region *AhSTS1***

CATTTGTAAAGCTTGATTGCTCTGTGTGTTCTCTCTAAAAATAAGTTCATTCCTGCAC  
TT  
CCATGTTGTATTGCAGGTTGGTATGAAGGTAATGGACTATAGGTTTCCATTTTGATTT  
GG  
CGAGACTTTTTTCCAAGTTTGTCTTTATATTTGTGGATGTTTTTTTTTTTTATGTTTTG  
G  
ATTTTTTTTAGGTTTTGGATGTTTTATTTTAAAATAATTTGGATTTTCTTTTAAATGT  
T  
TCTAAATATTTTTTAATTATTTTTTTATGTTCTTTTTCAATAATTTTAAACGTTAAAAA  
A  
AACGTTTCTTTTGTTAGGATTTAGATATTTGTTTTTGTAAATTTTGAACTTTTTAAT  
G  
ATTTTAGATTATTTTTATTAGATTTTGAATTTTTTATTATAAAATTAAGTATTATTA  
A  
AAAGTTGGCTAAAGAAGTATCAGTTACCTAGATTTTTTTCTATTCTCATATATGATAG  
AA  
AAACAGAAATGAACAAATCAATTAGAATTCTAAATATGGCTTCCTATTTATATCTAC  
AAC  
TAAGTAGCTCAGCTAGGCTTAATTTAAGTAATAAATTATATATTTATTATATCTAATA  
TT

ATTCAATTATTTTAAACAATAATTA AAAAATAAGAATAAGATAATTAATAATTAATAAA  
 TAT  
 AAAATAAAATAATTTTAAATTGATTTAGACTAATTTTCTATTACCTCCTTATCATTTT  
 GA  
 ATATACATAACCTTATTCTGCTTCTTGTGTTATTTTATAAAAAGAAGTAAATGAATTG  
 TT  
 AATATGCTTGCTAGAGATGCTTCTTATTAAAAGTGCAGATTGCGATCCAAATCAGGT  
 CAT  
 TGCATCATTAGTCTCTCTAAATTGAATTACGAAATAATATTCATATTTTATAAAATGA  
 AA  
 AAAATTCCTTTTTTTTTATATATATATTTCTTTTCATATGCTAGTCTCATTGCCCGTCTT  
 T  
 GCCTCTTTATCATTAGTGTCGTTGCCACCACTCCACCATAACCACTGGCAGCAACAA  
 GAA  
 GAAAGTGTGGAGGAAGTGGTAGCGGCATTGCGAATTAAGATGACATGAATATTTTT  
 TTTA  
 TATAAAATTAATTTTATTATATTCAACCTTGTATAATAAATTA AAAAATTAGACAAGA  
 AAG  
 TAACATTATTATATAGTTATGGGATACCACACAATAATATA AAAAATTACAAACATAA  
 TAC  
 TATCAAGCCTTGCACCTGTTGTACCTAATTCTTTTTAGTTTATCTTAAATGGAACCTCA  
 TA  
 TGAAGGTGTTTGTAGTTGTCCTAAAATGAAAATGCAACCCAAATATTAGTATGTGTC  
 ATA  
 TTGCTCAATCGAAAAGAATTTTATTTATTTTTTACTAACAATTACAAACTTTGAAATT  
 AA  
 ATCTTCACATAAAGAAATGACTTTAGACATTTTTGTATAAGTTTTCTCATCTAATA  
 AT  
 ATATAGGCCAATTAGGACCTTATTTCCGAACAAAATAAAATTATTAAAAAATAACA  
 AAAT  
 C

Web link

[file:///C:/Users/Lenovo%20330/AppData/Local/Temp/Temp1\\_PlantCARE\\_8915\\_Ahsts1\\_plantCARE.tar.zip/PlantCARE\\_8915\\_plantcare.html](file:///C:/Users/Lenovo%20330/AppData/Local/Temp/Temp1_PlantCARE_8915_Ahsts1_plantCARE.tar.zip/PlantCARE_8915_plantcare.html)

### **Arachis hypogaea Stilbene synthase (AhSTS2) complete CDS**

ATGGTGAATGTATCTGAGATTCGCAAGGCTCAAAGGGCTGAAGGCCCTGCAACTAT  
 AATGGCTATTGGCACAGCAACACCACAAAACCTGTGTTGATCAAAGCACTTATCCAG  
 ATTATTACTTCAGAATCACTAACAGCCAACACATGACCGAACTTAAAGAGAAGTTTC  
 AACGCATGTGCGACAAATCAATGATCAAGAAGAGATATATGTACTTAACGGAAGAG  
 ATCTTGAAAGAAAACCCAAACATGTGCAAATACATGGCACCATCGCTGGATGCAAG  
 GCAAGACATGGTGGTTGTGGAGGTTCCAAGGCTGGGAAAAGAGGGCGGCAACGAAA  
 GCCATAAAGGAGTGGGGTCAACCAAAGTCAAAGATAACACACTTGATCTTCTGCAC  
 CACAAGCGGCGTTGACATGCCCGGCGCCGATTACCAACTGACGAAACTCTTAGGCC  
 TCCGTCCGTCCGTGAAGAGGTACATGATGTACCAGCAAGGCTGCTTCGCTGGCGGCA  
 CGGTGCTCCGTTTGGCGAAGGACTTGGCGGAGAACACAAGGGTGCTCGTGTGCTG

GTGGTTTGTCTGAGATAACCGCCGTGACTTTCCGCGGTCCAAGCGAAACACATTTG  
GATAGTCTTGTGGGCAAGCATTGTTTCGGTGATGGCGCTGCTGCACTCATTGTTGGTT  
CCGATCCTCTGCCTCAGATCGAGAAGCCTGTCTTCGAGCTTGTTTGGACTGCTCAGA  
CTCTCGCTCCCGACAGCGAAGGCGCCATTGATGGCCACCTTCGTGAAGTTGGACTCA  
CATTCCATCTTCTCAAGGATGTTCCCTGGCATTGTTTCCAAGAACATTAACAAAGCAC  
TCACTGAAGCTTTTGATCCCCTGGGAATCTCTGATTACAACCTCCATCTTCTGGATTGC  
TCACCCTGGTGGCCCTGCAATCTTGGACCAGGTTGAAGACAAGCTCAAGTTGAAACC  
TCACAAGTTGAGAGCCACACGTGATGTTCTTAGCGACTATGGAAACATGTCCAGTGC  
TTGTGTCCTCTTCATCTTGGATCACATGAGAAACAAATCACTTCAACAAGGCCTTCA  
AACCCTGGTGAAGGTCTTGAATGGGGTGTCTTGTGCTTTGGACCTGGCCTCAC  
TATTGAAACTGTAGTTTTGCATAGTGTGGCTATATAA

### 5. Putative promoter region *AhSTS2*

TGCGGTTTGACGCGAGACCGCCCCAACACCATACAAAA

ACCGCGTATACGCGGATGTGGTCGTTCTTCGCTAGCAGCCTCCGCACCTCCACGTTG  
AGG

CTGTTCGTCAGCTTCGCCACTAGTCGAGCACGAAGAAAGTGTGGATTTGAGACTGTA  
GGT

GTAAGAGCTCCAACACAGTCTTCAGCAGCAAGCTCAGGAGCTTAATGATTATCGGG  
AGAT

GTATAAGAAGAACCTCACCCGCATGACATCTACGGATGAGCTTAGGCTGGAGTGGA  
GGA

GTCGCTGGAGCGGATGCATCGTATGGAGGCTCAGATGGAGGTGTATCTGACCTAGA  
TGCG

CGCCATTGGCATCGACCTTGCTAGTAGCAGCATCGCTGTTGGTGGCAGCAGCGATCT  
TGT

TGGTGGCATATAGATATCACCGCCTTCTGCGCCGTCAACTCAGGGCCACGGGACTGA  
CGA

CAAAGACGACGATTATCTGGATCTATAGTTATTAGTTTTTTGTTTTATTATTTTATTA  
TA

TTTATTTGATGTACTTGACTTTCAATTTATTTGCACATTGTATTATTTATTTTAAATAA  
A

AATTTTTTATTATTTATAAATTAATCACTAATTGTGTAAAAAAAATTTAAAATTAAAA  
TT

AAAATTGATCATTTATTTCAAATTTAAAAAAATTGATATTACCGTTAAAGTAATCAT  
AGG

AATAATTCGACGGTATTAGTGCGCCAATAATAGCGGTAGAAAAATTTGCCGGTAATC  
 AAT  
 TGATTTTTCGAGCTAACAGTAAATATTTACCAGTAAAATTTATACCGTCTAATTATTT  
 TT  
 TTATAGTAATTAATTTATCATTGAATTTTATTTATTTTTTCGATAATAAATTTAACGGT  
 A  
 CTTAACATTTTTTTTCGTAATGTATGACTACTTATAATACTTATTATTTTTATATTATTT  
 A  
 TTATGTATATACATTATTTTTATTTTGTTATTATAAAAACAGACTGTGTTATTCAACAAC  
 AC  
 ACATGACATGATTATTGTTTGAAATAACAATATTTTCCTCCTTAATTAGCGATTTTAA  
 AT  
 TTGATTTTAATGTTATTCTTAAAAAAACCATTTCGATGCACATATATTTCTATGTTAAC  
 AT  
 ATATGGCTCAACAAAAAATCACACTTAAAAGAGGTAATATATAGACCATTCAATTTG  
 ATC  
 ATTATTTTGGTGTCAATTCAATTTGACAATTGCCTAAATGGATGACTATTCCACATTT  
 TG  
 AATCCATGATTTTGAGAAGTTCATACGGAAACAATTAAGTCCTCCCTTTCTCATCAA  
 TTT  
 AAACACGAAAAAAAAGGCATTCTATAATTGTTCTTGGAATATTACATTATGACATG  
 GAA  
 ATAATGGTAAGGTAGCACGTGAAACTCAGCTACCCACCTATCCATAAATCTTTCGTT  
 ACA  
 ATGGTGCATATAAAACCCCATCTTCCACTAACAAGTGAGCAACACAACACACCCTTT  
 AAT  
 TATTAGCTACTGCATTTTCCTTC

Web link

[file:///C:/Users/Lenovo%20330/AppData/Local/Temp/Temp1\\_PlantCARE\\_9139\\_Ahsts2\\_plantCARE.tar.zip/PlantCARE\\_9139\\_plantcare.html](file:///C:/Users/Lenovo%20330/AppData/Local/Temp/Temp1_PlantCARE_9139_Ahsts2_plantCARE.tar.zip/PlantCARE_9139_plantcare.html)

## 6. *Arachis hypogaea* Stilbene synthase (*AhSTS3*) complete CDS

ATGGTGTCTGTGAGTGAGATCCGCAACATTCAAAGGGCAGAAGGCCCTGCAACTGT  
 ATTGGCAATTGGCACGGCAAATCCATCAAATTGTGTTGATCAGAGTACATATGCTGA  
 TTACTATTTTCAGAGTAACCGATAGCGAACACATGACTGATCTCAAAAAGAAATTTCA

GCGCATTGTGTGAAAGAACACAGATCAAGAACAGACATATGTACTTAACGGAAGAGA  
TACTGAAAGAGAATCCTAACATGTGTGCATACAAGGCACCATCGTTGGATGCAAGG  
GAAGATATGATGATTAGGGAGGTACCAAGGGTTGGAAAAGAGGCAGCAACCAAGG  
CCATCAAAGAATGGGGACAGCCAATGTCTAAAATCACACATTTGATCTTCTGCACCA  
CCAGCGGTGTTGCGTTGCCTGGCGTTGATTACGAACTCATCGTACTCTTAGGGCTCG  
ACCCATGCGTCAAGAGGTACATGATGTACCACCAAGGCTGCTTCGCTGGCGGCACT  
GTTCTTCGTTTGGCTAAGGACTTGGCTGAAAATAACAAGGATGCTCGTGTTCTTATT  
GTTTGTCTGAGAATACCGCAGTCACTTTCCGTGGTCCTAGTGAGACAGACATGGAT  
AGTCTTGTAGGACAAGCATTATTTGCGGATGGAGCTGCTGCGATTATCATTGGTTCT  
GATCCTGTGCCAGAGGTTGAGAAGCCTATCTTTGAGATTGTTTCGACTGATCAAAAG  
CTCGTCCCTGGCAGCCATGGAGCTATCGGTGGTCTCCTTCGTGAAGTTGGGCTTACA  
TTCTATCTTAACAAGAGTGTTCCCTGATATTATTTTCGCAAAATATCAACGACGCACTC  
AGTAAAGCTTTTGATCCATTGGGTATATCTGATTATAACTCAATATTTTGGATTGCAC  
ACCCTGGTGGACGTGCAATTTTGGACCAGGTTGAACAGAAGGTGAACTTGAAACCA  
GAAAAAATGAAAGCTACTAGAGATGTGCTTAGTAATTATGGTAATATGTCAAGTGC  
ATGTGTGTTCTTCATCATGGATTTGATGAGGAAGAAGTCTCTTGAAGAAGGACTTAA  
AACCACCGGTGAAGGACTTGATTGGGGTGTGCTTTTTGGCTTTGGTCTGCTCAC  
CATTGAAACTGTTGTTCTTCGCAGTGTGACCATCTGA

## 7. Putative promoter region *AhSTS3*

ACTTAAACATTTTATATTTGGATATTTTCATTTGTTATTTAGATTTTGAATTTGTATT  
T

TAGTTACGACCTATCCCTCTTACACACACACTAGAGGCGATGTATTATTGCATGCAT  
GCT

GATATAGACACTACTGGAATATCTTAAACAAATGTCTTATTGCAATATTATTGTTTA  
AAA

GCATTGTTTTATTAGAAAAATGTTATTTAGACGAGAAGTCATCAATTTTAAATTAGTC  
TT

TAAATTTAATAAATTAATTACATTAATTTTTATAAACTCACTTTTCAATTTTTTAACA  
AA

CTAACACTGTTAGATTTAATTTAACTTATATTTCTAAAATCCCTCTTTTTTTCAAAT  
C

TCTATTTTCACCAAGTCTGATTCTTTACTCTTCTTGTAAGTCTTTTTTTCCCCCTTAA  
A

TTTATACTTTATTATAAAGTATCTACCTAATAATAAATATAAAATAAAATAGTTAATT  
AT

GTTATTGTTTAATTTGGTCAAGCATGATGACTAATTAATTAAGAACATACTCATATG  
GTG



GTAGACTCCATTGTCATCCACCAACCTCCTCACACCCCCAGTCAAACCTACATGTTCA  
CTT

TGAATAATGAAATTTATTAAAAATGATAAGATCATAAATATACAATAAGTACCACA  
AGTT

AATTAATCAATAACACACGAACATTTTTGCTTCGAAGAGATTTCAACATGACATGGA  
CAA

AAATGCTACTAATGAAGCACGTGATGCCCAGCTACCTACATCTATTCAAAGGTAATT  
ATT

ATAGTGTTTAAAAAATAGTATTTAATTTATAGAAAAAAAAGTTAAAAATTAATATTT  
AAT

TTAAAAATAAAAGAATAAATAATTTTTAAATATTTAAAATTTATTATAAAAAATTAAA  
CAA

AAATTAGACACACTGTAAAATTGATCCTGTTCAAATTTCAAATAGCCGTCACATAT  
AAA

ATCTTATCTTCTAATAACAATTCTGAGATAGCTTGCTATAGTATGATTTCGATGCATTA  
GA

ACGATCAAATTAAAAGAAAGGAAAATTTTCGCAAACAAATAAAAAATAAAACACACA  
TTAA

AATAACAAATACTATATTCTACGATGAACAAACAAATAACAAATTCTATATTCTGGG  
CAA

GCACAAAACAGAGATACATAAATCACTAAGAAGTCAGAATATCTGAGCCGCCATCC  
ATAA

TAATAATATCATGAATTAATACTAAAACCTACACGAATATATATATTCATGAACAATC  
CAA

GTCAAAGTAACACAATAAAACAACCAAGAAGTCAGAATACATCAGCTGATCGCTTG  
AATC

CAGGAACATTATTACGAGTAGTTTATTATACTTTGAGTTGAGTACGTTTCCTACATAT  
GT

TTCAATTTGTCCATTTAATTCCACATATGCCCCTACTCTCATGAGTATAAATATCCCC  
CC

TCCCCCTGCCTAAGTCTTCACCAAAATACCAAAGAACATAGCTAATAAGCTTTGCTA  
TCC

C

Web link

file:///C:/Users/Lenovo%20330/AppData/Local/Temp/Temp1\_PlantCARE\_9798\_Ahsts3\_plantCARE.tar.zip/PlantCARE\_9798\_plantcare.html

### 8. *Arachis hypogaea* Stilbene synthase (*AhSTS4*) complete CDS

ATGGTGTCTGCAAGTGACATCCGCAAGGTTCAAAGAGCAGAAGGTCCTGCAACCGT  
CTTAGCGATTGGCACAGCAAATCCACCAAACCTGTGTTGATCAGAGCACATACGCAG  
ATTACTATTTTAGAGTAACTAATAGCGAGCACATGACCGACCTCAAGAAGAAATTTTC  
AGCGCATTTGTGAGAGAACACAGATCAAGAACAGACATATGTATCTAACGGAAGAA  
ATACTGAAGGAGAATCCTAACATGTGCGCATATAAAGCACCGTCCTTGGATGCAAG  
GGAAGACATGATGATCAGGGAGGTACCAAGGGTTGGAAAAGAGGCTGCAACTAAG  
GCAATCAAGGAATGGGGTCAGCCAATGTCTAAGATCACACATTTGATCTTCTGCACC  
ACCAGCGGTGTTGCGTTGCCTGGCGTTGATTACGAACTCATCGTACTCTTAGGGCTC  
GACCCAAGCGTCAAGAGGTACATGATGTACCACCAAGGCTGCTTCGCTGGCGGCAC  
TGTCCTTCGTTTGGCTAAGGACTTGGCTGAAAACAACAAGGATGCTCGTGTGCTTAT  
TGTTTGTCTGAAAATACTTCAGTCACTTTTCGTGGTCCTAGTGAGACAGACATGGAT  
AGTCTTGTAGGGCAAGCATTGTTTGCCGATGGAGCTGCTGCGATTATCATTGGTTCT  
GATCCTGTTCCAGAGGTTGAGAATCCTCTCTTTGAGATTGTTTCAACTGATCAACAA  
CTTGTCCTAACAGCCATGGAGCCATCGGTGGTCTCCTTCGTGAAGTTGGACTTACA  
TTCTATCTAACAAAGAGTGTTCGGATATTATTTACAAAACATCAATGATGCACTCA  
GTAAAGCTTTTGATCCACTAG

### 9. Putative promoter region *AhSTS4*

AATGATTGATGAGAAAGTTTTACTTAAAACATTTTATATTTGGATATTTTCATTTGTT  
AT  
TTAGATTTTGAATTTGTATTTTAGTTACGACCTATCCCTCTTACACACACACTAGAGG  
CG  
ATGTATTATTGCATGCATGCTGATATAGACACTACTGGAATATCTTAAACAAATGTC  
TTA  
TTGCAATATTATTGTTTAAAAGCATTGTTTTATTAGAAAAATGTTATTTAGACGAGA  
AGT  
CATCAATTTTTAATTAGTCTTTAAATTTAATAAATTAATTACATTAATTTTTATAAAC  
TC  
ACTTTTCAATTTTTTAACAACTAACACTGTTAGATTTAATTTAACTTATATTTCTAA  
AA  
TCCCTCTTTTTTTTCAAATCTCTATTTTCACCAAGTCTGATTCTTTACTCTTCTTGTA  
C  
TGCTTTTTTTCCCCCTTAAAATTTATACTTTATTATAAAGTATCTACCTAATAATAAA  
TA

TAAAATAAAATAGTTAATTATGTTATTGTTTAATTTGGTCAAGCATGATGACTAATT  
AAT

TAAGAACATACTCATATGGTGGTAGACTCCATTGTCATCCACCAACCTCCTCACACC  
CCC

AGTCAAACCTACATGTTCACTTTGAATAATGAAATTTATTAAAAATGATAAGATCATA  
AAT

ATACAATAAGTACCACAAGTTAATTAATCAATAACACACGAACATTTTTGCTTCGAA  
GAG

ATTTCAACATGACATGGACAAAAATGCTACTAATGAAGCACGTGATGCCCAGCTAC  
CTAC

ATCTATTCAAAGGTAATTATTATAGTGTTTAAAAAATAGTATTTAATTTATAGAAAA  
AAA

AGTTAAAAATTAATATTTAATTTAAAAATAAAAGAATAAATAATTTTTAAATATTTA  
AAA

TTTATTATAAAAAATTAAACAAAAATTAGACACACTGTAAAATTGATCCTGTTCAAAA  
TTT

CAAATAGCCGTCACATATAAAATCTTATCTTCTAATAACAATTCTGAGATAGCTTGC  
TAT

AGTATGATTGATGCATTAGAACGATCAAATTAAGAAAGGAAAATTTTCGCAAA  
CAAA

TAAAAATAAAACACACATTAAAATAACAAATACTATATTCTACGATGAACAAACAA  
ATAA

CAAATTCTATATTCTGGGCAAGCACAAAACAGAGATACATAAATCACTAAGAAGTC  
AGAA

TATCTGAGCCGCCATCCATAATAATAATCATGAATTAATACTAAAACTACACGAA  
TAT

ATATATTCATGAACAATCCAAGTCAAAGTAACACAATAAAACAACCAAGAAGTCAG  
AATA

CATCAGCTGATCGCTTGAATCCAGGAACATTATTACGAGTAGTTTATTATACTTTGA  
GTT

GAGTACGTTTCCTACATATGTTTCAATTTGTCCATTTAATTCCACATATGCCCCTACT  
CT

CATGAGTATAAATATCCCCCCTCCCCCTGCCTAAGTCTTCACCAAAATACCAAAGAA  
CATA

Web link

file:///C:/Users/Lenovo%20330/AppData/Local/Temp/Temp1\_PlantCARE\_10083\_Ahsts4\_plantCARE.tar.zip/PlantCARE\_10083\_plantcare.html

## 10. *Arachis hypogaea* Stilbene synthase (*AhSTS6*) complete CDS

ATGGTGTCTGCGAGTGACATCCGCAAAGTTCAAAGAGCAGAAGGCCCTGCAACTGT  
ATTAGCGATTGGCACAGCAAATCCACCAAACCTGTGTTGATCAGAGCACATATGCAG  
ATTACTATTTTAGAGTAACTAATAGCGAGCACATGACCGACCTCAAGAAAAAATTTTC  
AGCGCATTTGTGAGAGAACACAGATCAAAAACAGATATATGTATTTAACGGAAGAA  
ATACTAAAGGAGAATCCTAACATGTGCGCATACAAAGCACCGTCCTTGGATGCAAG  
AGAAGACATGATGATCAGGGAAGTACCAAGGGTTGGAAAAGAGGCTGCAACTAAG  
GCAATCAAGGAATGGGGTCAGCCAATGTCTAAAATCACACATTTGATCTTCTGCACC  
ACCAGCGGCGTTGCATTGCCTGGCGTTGATTATGAACTCATCGTACTCTTAGGGCTT  
GACCCAAGCGTCAAGAGGTACATGATGTACCACCAAGGCTGCTTTGCTGGCGGCAC  
TGTCCTTCGTTTGGCTAAGGACTTGGCTGAAAACAACAAGGATGCTCGTGTGCTTAT  
TGTTTGTCTGAAAATACTTCAATCACCTTTCGTGGTCCTAGTGAGACAGACATGGA  
TAGTCTTGTAGGGCAAGCATTGTTTGTGCTGATGGAGCTGCTGCGATTATCATTGGTTCT  
GATCCTATTCCAGATGTTGAGAATCCTCTCTTTGAGATTGTTTCAACTGATCAACAAC  
TTGTCCCTAACAGCCATGGAGCCATCGGTGGTCTCCTTCGTGAAGTTGGACTTACAT  
TCTATCTTAACAAGAGTGTTCGGATATTATTTTCAAAAACATCAATGATGCACTCA  
CTAAAGCTTTTGATCCACTAGGTATATCTGATTATAACTCAATATTTTGGATTGCACA  
TCCTGGTGGACGTGCAATTTTGGACCAAGTTGAAGAGAAGGTGAACTTGAACCAG  
AGAAGATGAAAGCCACTAGAGATGTGCTTAGCAATTATGGTAACATGTCAAGTGCA  
TGTGTGTTCTTCATTATGGATTGA

## 11. Putative promoter region *AhSTS6*

TTGAATTTTAATGATTGATGAGAAAGTTTTACTTAAAACATTTTATATTTGGATATTT  
TC  
  
ATTTGTTATTTAGATTTTGAATTTGTATTTTAGTTACGACCTATCCCTCTTACACACAC  
A  
  
CTAGAGGCGATGTATTATTGCATGCATGCTGATATAGACACTACTGGAATATCTTAA  
ACA  
  
AATGTCTTATTGCAATATTATTGTTTAAAAGCATTGTTTTATTAGAAAAATGTTATTT  
AG  
  
ACGAGAAGTCATCAATTTTAAATTAGTCTTTAAATTTAATAAATTAATTACATTAATT  
TT  
  
TATAAACTCACTTTTCAATTTTAAACAACTAACACTGTTAGATTTAATTTAACTTA  
TA  
  
TTTCTAAAATCCCTCTTTTTTTTCAAATCTCTATTTTCACCAAGTCTGATTCTTTACT  
C

TTCTTGTACTGCTTTTTTTCCCCCTTAAAATTTATACTTTATTATAAAGTATCTACCTA  
A  
TAATAAATATAAAATAAAATAGTTAATTATGTTATTGTTTAATTTGGTCAAGCATGA  
TGA  
CTAATTAATTAAGAACATACTCATATGGTGGTAGACTCCATTGTCATCCACCAACCT  
CCT  
CACACCCCCAGTCAAACCTACATGTTCACTTTGAATAATGAAATTTATTAAAAATGAT  
AAG  
ATCATAAATATACAATAAGTACCACAAGTTAATTAATCAATAACACACGAACATTTT  
TGC  
TTCGAAGAGATTTCAACATGACATGGACAAAAATGCTACTAATGAAGCACGTGATG  
CCCA  
GCTACCTACATCTATTCAAAGGTAATTATTATAGTGTTTAAAAAATAGTATTTAATTT  
AT  
AGAAAAAAAAGTTAAAAATTAATATTTAATTTAAAAATAAAAGAATAAATAATTTT  
TAAA  
TATTTAAAATTTATTATAAAAATTAAACAAAAATTAGACACACTGTAAAATTGATCC  
TGT  
TCAAAATTTCAAATAGCCGTCACATATAAAATCTTATCTTCTAATAACAATTCTGAG  
ATA  
GCTTGCTATAGTATGATTCGATGCATTAGAACGATCAAATTTAAAGAAAGGAAAAT  
TTTC  
GCAAACAAATAAAAAATAAAACACACATTAAAATAACAAATACTATATTCTACGATG  
ACA  
AACAAATAACAAATTCTATATTCTGGGCAAGCACAAAACAGAGATACATAAATCAC  
TAAG  
AAGTCAGAATATCTGAGCCGCCATCCATAATAATAATATCATGAATTAATACTAAAA  
CTA  
CACGAATATATATATTCATGAACAATCCAAGTCAAAGTAACACAATAAAACAACCA  
AGAA  
GTCAGAATACATCAGCTGATCGCTTGAATCCAGGAACATTATTACGAGTAGTTTATT  
ATA  
CTTTGAGTTGAGTACGTTTCCTACATATGTTTCAATTTGTCCATTTAATTCCACATAT  
GC

CCCTACTCTCATGAGTATAAATATCCCCCTCCCCCTGCCTAAGTCTTCACCAAATA  
CC

Web link

file:///C:/Users/Lenovo%20330/AppData/Local/Temp/Temp1\_PlantCARE\_9636\_Ahsts6\_plantC  
ARE.tar.zip/PlantCARE\_9636\_plantcare.html
